# Supplementary material for: The psychological effects of forced family separation on asylum-seeking children and parents at the US-Mexico border: A qualitative analysis of medico-legal documents
Source: PubMed Central journal article supplement (PMC8612557; doi:10.1371/journal.pone.0259576), 2021-11-24
Supplement: pone.0259576.s001.pdf [file pone.0259576.s001.pdf]

**To:** Mary Ellen Heisler

**Cc:**

Mary Ellen Heisler

**Subject:** eResearch System-Generated Notice of “Not Regulated” Status for HUM00160477

**SUBMISSION INFORMATION**

**Title:** Review of De-Identified Medical Affidavits of US Asylum Seekers who Experienced Family Separation

**Full Study Title (if applicable):** Review of De-Identified Medical Affidavits of US Asylum Seekers who Experienced Family Separation

**Study eResearch ID:** HUM00160477

**Date of this System-Generated Notice:** 3/5/2019

**IRB "NOT REGULATED" STATUS:**

Based on the information provided, the proposed study does not fit the definition of research involving human subjects ([45CFR46.102](#)) because the researchers intending to contribute to generalizable knowledge do not interact with human subjects, nor obtain identifiable private information or identifiable biospecimens.
